# Supplementary material for: Gut Bacteria Selectively Altered by Sennoside A Alleviate Type 2 Diabetes and Obesity Traits
Source: Oxid Med Cell Longev. 2020 Jun 25;2020:2375676. doi: 10.1155/2020/2375676 (PMC7334780; doi:10.1155/2020/2375676)
Supplement: Supplementary Materials — Graphical abstract: Sennoside A alleviated T2D and obesity traits by remodeling the gut microbiota in db/db mice. Figure S1: Sennoside A reduced obesity and glucose homeostasis in db/db mice. Experiments were performed as in Figure 1. (A) Fasting glucose, (B) body weight gain, (C) TG and TC, and (D) free fatty acids were monitored after a 12-week period of treatments. (E) Representative photos of the liver. Scale bar: 1 cm. (F) Representative HE-stained sections of the liver. Scale bar: 200 μm. Figure S2. Sennoside A reduced the expressions of genes involved in adipocyte differentiation in the liver and epididymal adipose tissues (n = 5). Relative mRNA expression levels of lipogenic genes (A) SREBP1c, (B) FASN, and (C) SCD1 as well as lipid oxidation genes (D) ACOX1, (E) ACOX2, and (F) CPT1α. Figure S3: (A) differential abundances of the contigs between WT and db/db mice were calculated for 8 weeks. Bacterial taxonomic profiling at the phylum level of intestinal bacteria from different groups. Experiments were performed as in Figure 2. (B) The rapid increase of food intake, blood glucose, and body weight were delayed after the antibiotic cocktail therapy. (C) The heatmaps show the relative abundance of 33 bacterial genuses (including 11 increased genuses and 20 reduced genuses) significantly altered by 50 mg/kg Sennoside A in comparison with the control group (in db/db mice). Experiments were performed as in Figure 3(c) and Supplementary dataset S1. Figure S4: the quantification of liver and epididymal adipose tissues immunoblots for TLR4, IkB-α, and NF-κB (A and B). Experiments were performed as in Figure 5(b). Representative ileum immunoblots for ZO-1 and occludin in each group (C). Experiments were performed as in Figure 5(f). Insulin signalings in liver (D) and epididymal adipose tissues (E) were analyzed by immunoblotting with antibodies against p-AKT, total AKT, p-GSK3β, and total GSK3β. GAPDH was used as loading control. Figure S5: mice received a weekly micr [file 2375676.f1.zip › mat.2375676.v1.xlsx]

## Sheet: Sheet1
db/db vs WT	Ctrl vs Sen		Ctrl vs Sen	db/db vs WT
Enriched in WT	Enriched by Sen		Enriched by Ctrl	Enriched in db/db
Desulfovibrionaceae	Verrucomicrobiaceae_Akkermansia		Desulfovibrionaceae_Bilophila	Dehalobacteriaceae_Dehalobacterium
Verrucomicrobiaceae_Akkermansia	Deferribacteraceae_Mucispirillum		Helicobacteraceae_Flexispira	Lactobacillaceae_Lactobacillus
Deferribacteraceae_Mucispirillum	Odoribacteraceae_Odoribacter		Lachnospiraceae_Coprococcus	Mogibacteriaceae
Rikenellaceae	Clostridiaceae_SMB53		Not_Assigned	Lachnospiraceae
Enterobacteriaceae	Porphyromonadaceae_Parabacteroides		Desulfovibrionaceae	Lachnospiraceae_Ruminococcus
Peptostreptococcaceae_Clostridium	Desulfovibrionaceae_Desulfovibrio		Rikenellaceae_AF12	Not_Assigned
Ruminococcaceae	Enterobacteriaceae_Klebsiella		Lachnospiraceae	S24_7
Bacteroidaceae_Bacteroides	Lachnospiraceae_Dorea		Lactobacillaceae_Lactobacillus	Ruminococcaceae_Ruminococcus
Ruminococcaceae_Anaerotruncus	Clostridiaceae		Bacteroidaceae_Bacteroides	Ruminococcaceae_Oscillospira
	Erysipelotrichaceae		Mogibacteriaceae	Helicobacteraceae_Flexispira
	Turicibacteraceae_Turicibacter		Ruminococcaceae_Ruminococcus	Anaeroplasmataceae_Anaeroplasma
			Anaeroplasmataceae_Anaeroplasma	Desulfovibrionaceae_Bilophila
			Rikenellaceae	Desulfovibrionaceae_Desulfovibrio
			Prevotellaceae_Prevotella	Enterobacteriaceae_Klebsiella
			Enterobacteriaceae	F16
			Lachnospiraceae_Ruminococcus	Clostridiaceae
			Ruminococcaceae	Odoribacteraceae_Odoribacter
			Ruminococcaceae_Oscillospira	Clostridiaceae_Clostridium
			Dehalobacteriaceae_Dehalobacterium	Erysipelotrichaceae
			S24_7

## Sheet: Sheet2
Dehalobacteriaceae_Dehalobacterium
Lactobacillaceae_Lactobacillus
Mogibacteriaceae
Lachnospiraceae
Lachnospiraceae_Ruminococcus
Not_Assigned
S24_7
Ruminococcaceae_Ruminococcus
Ruminococcaceae_Oscillospira
Helicobacteraceae_Flexispira
Anaeroplasmataceae_Anaeroplasma
Desulfovibrionaceae_Bilophila
